# Supplementary material for: A Sustainable Material for Sheep’s Cheese Wedges Stored under Different Atmosphere Conditions
Source: MDPI journal article supplement (doi:10.3390/foods13091423), 2024-05-06
Supplement: s1 [file s1]

## Supplementary file

**Table S1.** Mean values  $\pm$  standard deviation for L\*, a\* and b\* colour parameters of the cheese wedges stored for 56 days at different treatments. Significance level of ANOVA is shown for differences in the storage time.

|           | Day | Air                           | Vacuum                          | MAP1                           | MAP2                          |
|-----------|-----|-------------------------------|---------------------------------|--------------------------------|-------------------------------|
| <b>L*</b> | 0   | 76.92 $\pm$ 2.51 <sup>a</sup> | 76.92 $\pm$ 2.51 <sup>a</sup>   | 76.92 $\pm$ 2.51 <sup>a</sup>  | 76.92 $\pm$ 2.51 <sup>a</sup> |
|           | 14  | 77.16 $\pm$ 2.00 <sup>a</sup> | 77.13 $\pm$ 0.80 <sup>a</sup>   | 74.99 $\pm$ 0.86 <sup>a</sup>  | 75.08 $\pm$ 0.64 <sup>a</sup> |
|           | 21  | 73.99 $\pm$ 0.99 <sup>a</sup> | 75.39 $\pm$ 1.42 <sup>a</sup>   | 75.79 $\pm$ 1.44 <sup>a</sup>  | 75.25 $\pm$ 0.38 <sup>a</sup> |
|           | 28  | 77.96 $\pm$ 0.92 <sup>a</sup> | 76.58 $\pm$ 1.61 <sup>a</sup>   | 77.39 $\pm$ 1.46 <sup>a</sup>  | 77.16 $\pm$ 1.12 <sup>a</sup> |
|           | 35  | 77.62 $\pm$ 0.95 <sup>a</sup> | 77.46 $\pm$ 1.02 <sup>a</sup>   | 76.95 $\pm$ 0.95 <sup>a</sup>  | 76.86 $\pm$ 0.51 <sup>a</sup> |
|           | 42  | 74.59 $\pm$ 0.41 <sup>a</sup> | 74.29 $\pm$ 1.33 <sup>a</sup>   | 75.59 $\pm$ 0.45 <sup>a</sup>  | 73.95 $\pm$ 0.62 <sup>a</sup> |
|           | 49  | 76.11 $\pm$ 1.37 <sup>a</sup> | 74.55 $\pm$ 0.15 <sup>a</sup>   | 75.60 $\pm$ 0.46 <sup>a</sup>  | 75.92 $\pm$ 1.50 <sup>a</sup> |
|           | 56  | 75.37 $\pm$ 1.83 <sup>a</sup> | 74.04 $\pm$ 2.22 <sup>a</sup>   | 74.68 $\pm$ 2.10 <sup>a</sup>  | 75.04 $\pm$ 0.73 <sup>a</sup> |
|           |     | NS                            | NS                              | NS                             | NS                            |
| <b>a*</b> | 0   | -3.04 $\pm$ 0.79 <sup>a</sup> | -3.04 $\pm$ 0.79 <sup>a</sup>   | -3.04 $\pm$ 0.79 <sup>a</sup>  | -3.04 $\pm$ 0.79 <sup>a</sup> |
|           | 14  | -3.79 $\pm$ 0.49 <sup>a</sup> | -2.02 $\pm$ 0.72 <sup>a</sup>   | -2.20 $\pm$ 0.52 <sup>a</sup>  | -2.46 $\pm$ 0.28 <sup>a</sup> |
|           | 21  | -3.81 $\pm$ 0.05 <sup>a</sup> | -2.15 $\pm$ 0.52 <sup>a</sup>   | -2.15 $\pm$ 0.44 <sup>a</sup>  | -2.42 $\pm$ 0.51 <sup>a</sup> |
|           | 28  | -3.58 $\pm$ 0.47 <sup>a</sup> | -2.17 $\pm$ 0.52 <sup>a</sup>   | -2.14 $\pm$ 0.73 <sup>a</sup>  | -2.39 $\pm$ 0.38 <sup>a</sup> |
|           | 35  | -3.41 $\pm$ 0.23 <sup>a</sup> | -2.19 $\pm$ 0.17 <sup>a</sup>   | -2.15 $\pm$ 0.98 <sup>a</sup>  | -2.21 $\pm$ 0.78 <sup>a</sup> |
|           | 42  | -3.50 $\pm$ 0.29 <sup>a</sup> | -2.11 $\pm$ 0.83 <sup>a</sup>   | -3.00 $\pm$ 1.97 <sup>a</sup>  | -2.26 $\pm$ 0.52 <sup>a</sup> |
|           | 49  | -3.25 $\pm$ 0.49 <sup>a</sup> | -1.85 $\pm$ 0.53 <sup>a</sup>   | -2.04 $\pm$ 0.85 <sup>a</sup>  | -2.31 $\pm$ 0.54 <sup>a</sup> |
|           | 56  | -3.70 $\pm$ 0.04 <sup>a</sup> | -2.36 $\pm$ 0.59 <sup>a</sup>   | -2.24 $\pm$ 0.77 <sup>a</sup>  | -2.57 $\pm$ 0.64 <sup>a</sup> |
|           |     | NS                            | NS                              | NS                             | NS                            |
| <b>b*</b> | 0   | 13.79 $\pm$ 0.31 <sup>a</sup> | 13.79 $\pm$ 0.31 <sup>a</sup>   | 13.79 $\pm$ 0.31 <sup>a</sup>  | 13.79 $\pm$ 0.31 <sup>a</sup> |
|           | 14  | 13.65 $\pm$ 0.29 <sup>a</sup> | 11.79 $\pm$ 0.03 <sup>bc</sup>  | 11.30 $\pm$ 0.59 <sup>ab</sup> | 11.70 $\pm$ 0.04 <sup>b</sup> |
|           | 21  | 13.23 $\pm$ 0.13 <sup>a</sup> | 11.40 $\pm$ 0.33 <sup>bcd</sup> | 11.15 $\pm$ 0.56 <sup>ab</sup> | 11.20 $\pm$ 0.76 <sup>b</sup> |
|           | 28  | 13.46 $\pm$ 0.13 <sup>a</sup> | 11.46 $\pm$ 0.09 <sup>bcd</sup> | 11.52 $\pm$ 0.45 <sup>ab</sup> | 11.99 $\pm$ 0.10 <sup>b</sup> |
|           | 35  | 13.56 $\pm$ 0.23 <sup>a</sup> | 12.09 $\pm$ 0.35 <sup>b</sup>   | 11.53 $\pm$ 0.70 <sup>ab</sup> | 11.64 $\pm$ 0.30 <sup>b</sup> |
|           | 42  | 13.34 $\pm$ 0.23 <sup>a</sup> | 10.75 $\pm$ 0.37 <sup>d</sup>   | 11.76 $\pm$ 1.50 <sup>ab</sup> | 10.96 $\pm$ 0.12 <sup>b</sup> |
|           | 49  | 13.28 $\pm$ 0.18 <sup>a</sup> | 10.62 $\pm$ 0.10 <sup>d</sup>   | 10.70 $\pm$ 0.80 <sup>b</sup>  | 11.02 $\pm$ 0.22 <sup>b</sup> |
|           | 56  | 13.22 $\pm$ 0.34 <sup>a</sup> | 11.10 $\pm$ 0.06 <sup>cd</sup>  | 10.74 $\pm$ 0.36 <sup>b</sup>  | 11.28 $\pm$ 0.30 <sup>b</sup> |
|           |     | NS                            | **                              | *                              | **                            |

L\*: lightness; a\*: redness; b\*: yellowness; MAP1: 50/50 CO<sub>2</sub>/N<sub>2</sub> (v/v); MAP2: 80/20 CO<sub>2</sub>/N<sub>2</sub> (v/v). Different letters in the same column indicate significant differences during storage for each packaging treatment. \*\*p  $\leq$  0.01; \* p  $\leq$  0.05; NS: non significant differences
